# Supplementary material for: Regional variation in long-term care spending in Japan
Source: Springer Nature journal article supplement (doi:10.1186/s12889-022-14194-6), 2022-09-23

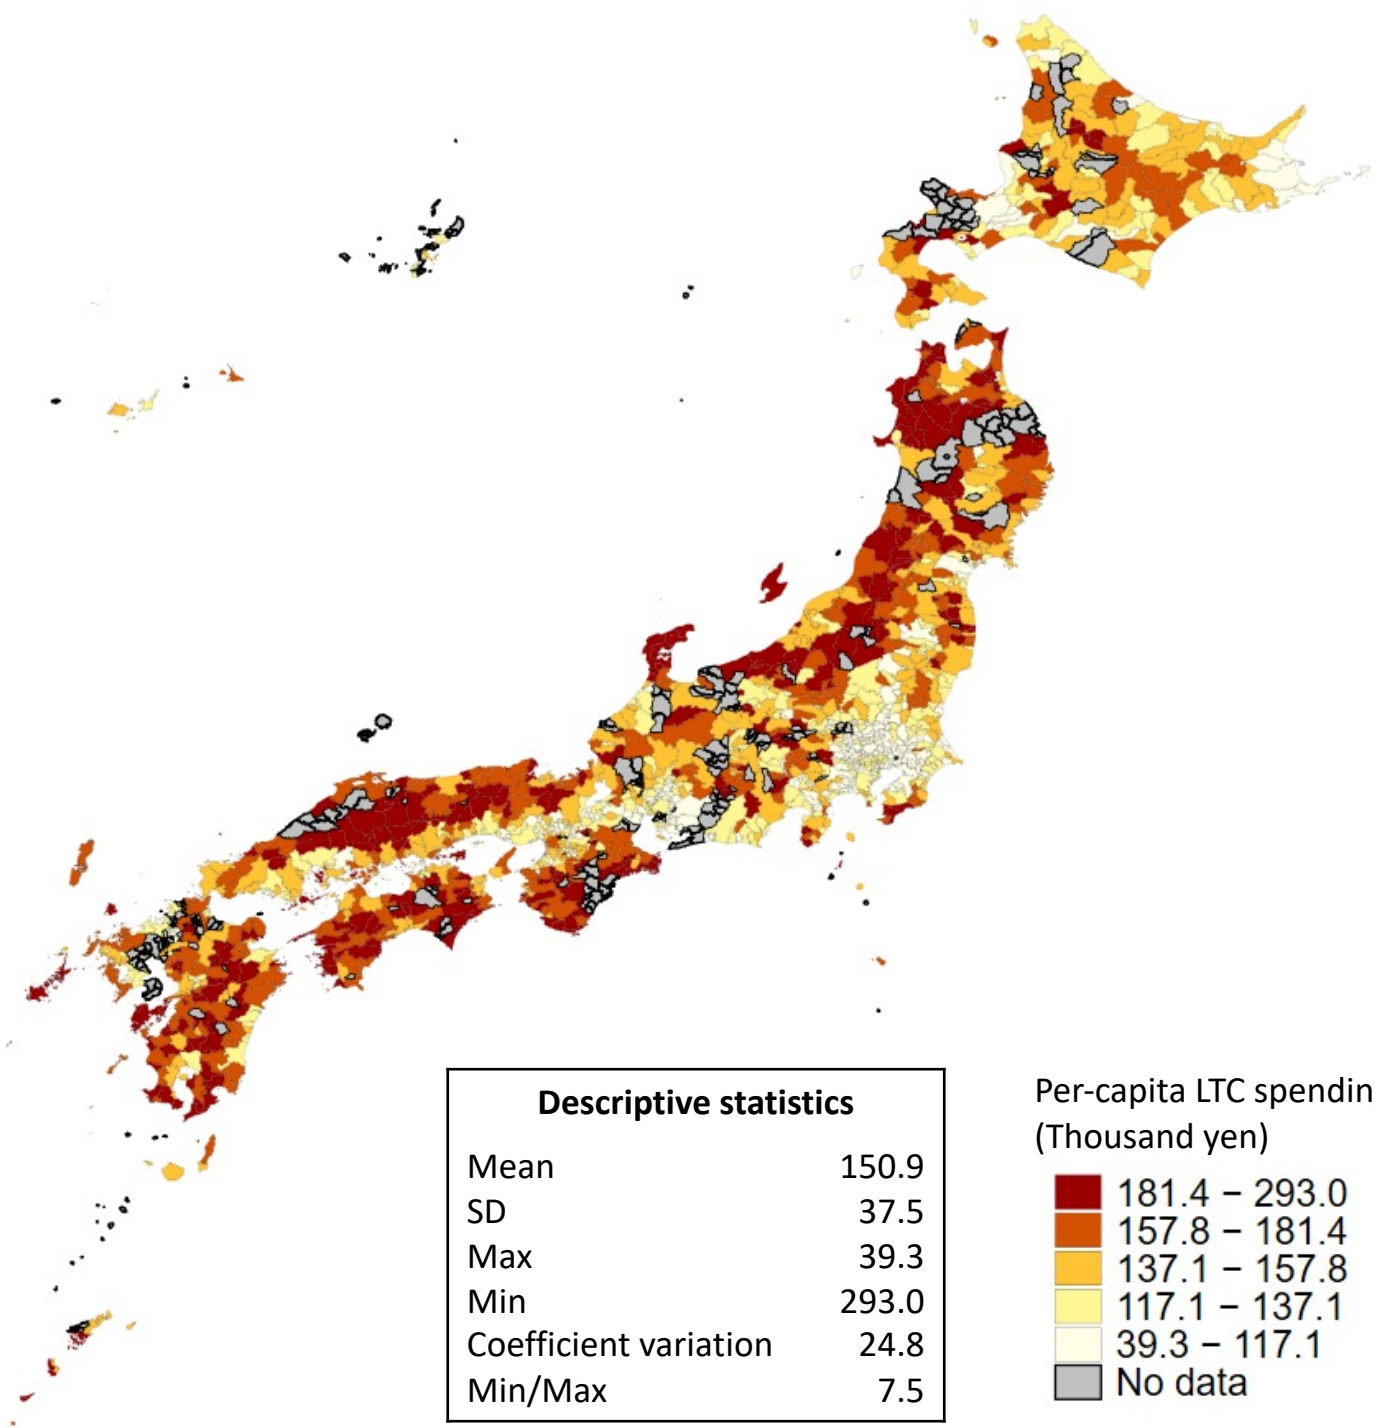

Supplement: MOESM1 [file 23531570]
